# Supplementary material for: Behavioural and neuroanatomical correlates of auditory speech analysis in primary progressive aphasias
Source: Springer Nature journal article supplement (doi:10.1186/s13195-017-0278-2), 2017-07-27
Supplement: MOESM1 [file 13333660]

  


Behavioural and neuroanatomical correlates of auditory speech analysis in primary progressive aphasias | springermedizin.de


Behavioural and neuroanatomical correlates of auditory speech analysis in primary progressive aphasias | springermedizin.de
Skip to main content

Menü

Hauptrubriken

Chevron down icon


Chevron up icon

CME


Facharzt-Training


Webinare


Zeitschriften


Bücher


e.Medpedia


Podcast

Newsletter


Abo-Shop

Service

Chevron down icon


Chevron up icon

Jobbörse


Info & Hilfe

Fachgebiete

Chevron down icon


Chevron up icon

Anästhesiologie


Allgemeinmedizin


Arbeitsmedizin


Augenheilkunde


Chirurgie


Dermatologie


Gynäkologie und Geburtshilfe


HNO


Innere Medizin


Kardiologie


Neurologie


Onkologie und Hämatologie


Orthopädie und Unfallchirurgie


Pädiatrie


Pathologie


Psychiatrie


Radiologie


Rechtsmedizin


Urologie


Zahnmedizin

Themen

Chevron down icon


Chevron up icon

Klimawandel und Gesundheit


Neues aus dem Markt


COVID-19


Praxis und Beruf


Seltene Erkrankungen


GOÄ & EBM


Panorama

Sammlungen

Chevron down icon


Chevron up icon

Kasuistiken


Algorithmen & Infografiken


Blickdiagnosen


Arthropedia


FlapFinder (für Dermatochirurgen)


Videos


Kongressberichterstattung


Medizin für Apothekerinnen und Apotheker


Für Ärztinnen und Ärzte in Weiterbildung


Für Medizinstudierende

#### Live-Webinar "Chronische Unterbauch- und Viszeralschmerzen in der Praxis managen"

Das Thema chronische Unterbauch- und Viszeralschmerzen wird im Live-Webinar am **7. Mai von 17.30 bis 19 Uhr** aus internistischer, gynäkologischer und psychologisch-neurowissenschaftlicher Perspektive beleuchtet. Besprochen werden krankheitsbedingte Ursachen, Mechanismen der kognitiven Schmerzmodulation sowie mögliche Therapieoptionen. Die Fortbildung ist mit 2 CME-Punkten zertifiziert. Melden Sie sich jetzt an!

Springer Medizin

Suche

Search icon

Erweiterte Suche

Anmelden

### Springer Medizin

JAVASCRIPT BENÖTIGT

Bitte aktivieren Sie Java-Script in Ihrem Browser, damit Sie alle Vorteile und Funktionen dieser Website nutzen können.

INTERNET EXPLORER WIRD NICHT MEHR UNTERSTÜZT

Der Internet Explorer wird als Browser seitens Microsoft nicht mehr unterstützt. Für Ihr optimales Nutzungserlebnis wählen Sie bitte Microsoft Edge, Safari, Chrome oder Firefox als Browser.

nach oben

Alzheimer's Research & Therapy

Erschienen in:

Open Access
01.12.2017 | Research

# Behavioural and neuroanatomical correlates of auditory speech analysis in primary progressive aphasias

Erschienen in:
Alzheimer's Research & Therapy 
|
Ausgabe 1/2017

download

DOWNLOAD

print

DRUCKEN

SUCHEN IM ARTIKEL
close

0  /  0

0

Vorherige

Nächste

insite

SUCHEN

download

DOWNLOAD

print

DRUCKEN

Metadaten

Titel
:   Behavioural and neuroanatomical correlates of auditory speech analysis in primary progressive aphasias

Publikationsdatum
:   01.12.2017

Erschienen in
:   Alzheimer's Research & Therapy 
    / Ausgabe 1/2017
      
    Elektronische ISSN: 1758-9193

DOI
:   https://doi.org/10.1186/s13195-017-0278-2

### Weitere Artikel der Ausgabe 1/2017


Zur Ausgabe

Research

### Association between chronic periodontitis and the risk of Alzheimer’s disease: a retrospective, population-based, matched-cohort study

Research

### Dietary arachidonic acid increases deleterious effects of amyloid-β oligomers on learning abilities and expression of AMPA receptors: putative role of the ACSL4-cPLA2 balance

Research

### Attitudes toward clinical trials across the Alzheimer’s disease spectrum

Review

### Gene suppression approaches to neurodegeneration

Research

### Proportion of dementia in Australia explained by common modifiable risk factors

Research

### Memory performance-related dynamic brain connectivity indicates pathological burden and genetic risk for Alzheimer’s disease

## Leitlinien kompakt für die Neurologie

Mit **medbee** Pocketcards sicher entscheiden.

﻿Seit 2022 gehört die medbee GmbH zum Springer Medizin Verlag

Kostenlos registrieren

Anzeige

## Neu im Fachgebiet Neurologie

## Sind Frauen die fähigeren Ärzte?

30.04.2024


Gendermedizin
Nachrichten

Patienten, die von Ärztinnen behandelt werden, dürfen offenbar auf bessere Therapieergebnisse hoffen als Patienten von Ärzten. Besonders scheint das auf weibliche Kranke zuzutreffen, wie eine Studie zeigt.

## Akuter Schwindel: Wann lohnt sich eine MRT?

28.04.2024


Schwindel
Nachrichten

Akuter Schwindel stellt oft eine diagnostische Herausforderung dar. Wie nützlich dabei eine MRT ist, hat eine Studie aus Finnland untersucht. Immerhin einer von sechs Patienten wurde mit akutem ischämischem Schlaganfall diagnostiziert.

## Niedriger diastolischer Blutdruck erhöht Risiko für schwere kardiovaskuläre Komplikationen

25.04.2024


Hypotonie
Nachrichten

Wenn unter einer medikamentösen Hochdrucktherapie der diastolische Blutdruck in den Keller geht, steigt das Risiko für schwere kardiovaskuläre Ereignisse: Darauf deutet eine Sekundäranalyse der SPRINT-Studie hin.

## Frühe Alzheimertherapie lohnt sich

25.04.2024


AAN-Jahrestagung 2024
Nachrichten

Ist die Tau-Last noch gering, scheint der Vorteil von Lecanemab besonders groß zu sein. Und beginnen Erkrankte verzögert mit der Behandlung, erreichen sie nicht mehr die kognitive Leistung wie bei einem früheren Start. Darauf deuten neue Analysen der Phase-3-Studie Clarity AD.

## Update Neurologie

Bestellen Sie unseren Fach-Newsletterund bleiben Sie gut informiert.

Newsletter bestellen

- » zur Themenseite Neurologie

Bildnachweise

Die Leitlinien für Ärztinnen und Ärzte, Ärztin informiert ältere Patientin/© pucko\_ns / stock.adobe.com (Symbolbild mit Fotomodellen), Eine Frau im MRT/© Maksym Povozniuk / stock.adobe.com (Symbolbild mit Fotomodellen), Frau misst Blutdruck/© Microgen / stock.adobe.com (Symbolbild mit Fotomodell), Senior mit Gedächtnisproblemen/© LIGHTFIELD STUDIOS / stock.adobe.com (Symbolbild mit Fotomodell)

- Home
  - CME
  - Facharzt-Training
  - Webinare
  - Zeitschriften
  - Bücher
  - e.Medpedia
  - Springer Medizin Podcast – der Talk für Gesundheitsprofis
- Pseudoseite
  - Newsletter
  - Abo-Shop
- Service
  - Jobbörse
  - Info & Hilfe
- Fachgebiete
  - Anästhesiologie
  - Allgemeinmedizin
  - Arbeitsmedizin
  - Augenheilkunde
  - Chirurgie
  - Dermatologie
  - Gynäkologie und Geburtshilfe
  - HNO
  - Innere Medizin
  - Kardiologie
  - Neurologie
  - Onkologie und Hämatologie
  - Orthopädie und Unfallchirurgie
  - Pädiatrie
  - Pathologie
  - Psychiatrie
  - Radiologie
  - Rechtsmedizin
  - Urologie
  - Zahnmedizin
- Themen
  - Klimawandel und Gesundheit
  - Neues aus dem Markt
  - COVID-19
  - Praxis und Beruf
  - Seltene Erkrankungen
  - GOÄ & EBM
  - Panorama
- Sammlungen
  - Kasuistiken
  - Algorithmen & Infografiken
  - Blickdiagnosen
  - Arthropedia
  - FlapFinder
  - Videos
  - Kongressberichterstattung
  - Medizin für Apothekerinnen und Apotheker
  - Für Ärztinnen und Ärzte in Weiterbildung
  - Für Medizinstudierende

SpringerMedizin.de – Mein Fachwissen. Aktuelle, verlässliche Information und Fortbildung für Ärztinnen und Ärzte im Berufsalltag.

#### Direktzugriff

Home


Fachgebiete


CME-Fortbildung


Facharzt-Training


Webinare


Zeitschriften


Bücher


e.Medpedia

#### Meine Inhalte

Meine Lesezeichen


Meine Newsletter


Mein CME (Punktekonto)


Mein e.Med


Meine Zeitschriften


Mein b.Flat


Mein e.Dent

#### Abo-Shop

e.Med Interdisziplinär


e.Med für Ihr Fachgebiet


e.Medpedia


e.Dent


Zeitschriften


Bücher


FlapFinder


Angebote für Kliniken

#### Info- und Hilfeseiten

Info & Hilfe


Kundenservice


Über SpringerMedizin.de


Warum registrieren?


Nachhaltigkeitsinitiative Impuls


Für Autorinnen und Autoren


Für Gutachterinnen und Gutachter


Mediadaten & Werbemöglichkeiten


Jobbörse

#### Folgen Sie uns

Instagram


X


Facebook


YouTube


LinkedIn

#### Rechtliche Informationen

Allgemeine Geschäftsbedingungen


Nutzungsbedingungen


Datenschutzerklärung


Impressum


Cookies verwalten


Verträge hier kündigen

#### Für Mitglieder von Fachgesellschaften

Organ-Zeitschriften


BDC


BDI


DGIIN


DGIM


DGKJ

DGN


DGOU, BVOU, DGU, DGOOC und VLOU


DGRh


DOG


Deutsche Schmerzgesellschaft


ÖGKJ

Springer Nature Logo

© Springer Medizin Verlag GmbH

Version: 0.3578.0
