# Supplementary material for: Behavioural and neuroanatomical correlates of auditory speech analysis in primary progressive aphasias
Source: Springer Nature journal article supplement (doi:10.1186/s13195-017-0278-2), 2017-07-27
Supplement: MOESM11 [file 13333660]

**Additional file 11.** Neuroanatomical associations of disease-related grey matter atrophy

| Region                                              | Side | Cluster (voxels) | Peak (mm) |     |     | t-value |
|-----------------------------------------------------|------|------------------|-----------|-----|-----|---------|
|                                                     |      |                  | x         | y   | z   |         |
| <b>Nonfluent primary progressive aphasia</b>        |      |                  |           |     |     |         |
| Supplementary motor cortex*                         | L    | 2581             | -8        | 9   | 48  | 5.97    |
| Insula/ precentral gyrus                            | L    | 4903             | -38       | 14  | 2   | 5.80    |
| Lingual gyrus                                       | R    | 104              | 21        | -48 | -4  | 5.19    |
| Lingual gyrus                                       | L    | 595              | -15       | -56 | -2  | 5.05    |
| Middle frontal gyrus                                | R    | 108              | 45        | 12  | 34  | 5.00    |
| Fusiform gyrus                                      | L    | 185              | -28       | -12 | -33 | 4.90    |
| Inferior temporal gyrus                             | L    | 376              | -56       | -63 | -15 | 4.87    |
| Supplementary motor cortex                          | R    | 141              | 12        | 3   | 60  | 4.84    |
| Fusiform gyrus                                      | R    | 279              | 28        | -30 | -24 | 4.78    |
| Thalamus                                            | L    | 101              | -20       | -32 | -3  | 4.65    |
| Precentral gyrus                                    | R    | 304              | 40        | -15 | 52  | 4.49    |
| Supramarginal gyrus                                 | R    | 193              | 57        | -44 | 39  | 4.18    |
| Supramarginal gyrus*                                | L    | 136              | -40       | -42 | 38  | 4.01    |
| <b>Semantic variant primary progressive aphasia</b> |      |                  |           |     |     |         |
| Temporal pole                                       | L    | 29614            | -33       | 14  | -32 | 13.82   |
| Temporal pole                                       | R    | 8845             | 39        | 9   | -34 | 7.79    |
| Anterior cingulate                                  | L    | 103              | -4        | -3  | 33  | 4.71    |
| Anterior cingulate (separate locus)                 | L    | 406              | -4        | 24  | 32  | 4.04    |

The Table summarises the distribution of significant disease-related regional grey matter loss, comparing each syndromic group with the healthy control group in a voxel based morphometric analysis. All values shown were significant at a lenient threshold  $p < 0.001$  uncorrected over the whole brain volume; clusters  $> 100$  voxels in size are included and coordinates of local maxima are in MNI standard space; \*region also identified as a significant association of experimental psychoacoustic task performance (see Table 2).
